# Supplementary material for: Effect of EARLY administration of DEXamethasone in patients with COVID-19 pneumonia without acute hypoxemic respiratory failure and risk of development of acute respiratory distress syndrome (EARLY-DEX COVID-19): study protocol for a randomized controlled trial
Source: PubMed Central journal article supplement (PMC9479245; doi:10.1186/s13063-022-06722-x), 2022-09-15
Supplement: 13063_2022_6722_MOESM2_ESM.pdf [file 13063_2022_6722_MOESM2_ESM.pdf]

Referencia: MUH/CLIN/EC

**ASUNTO:** RESOLUCIÓN DE LA SOLICITUD DE AUTORIZACIÓN DE UN ENSAYO CLÍNICO

**DESTINATARIO:** Fundación para la Investigación e Innovación Biomédica (FIIB) del Hospital Universitario Infanta Leonor y Hospital Unive  
Calle Puerto de Lumbreras, 5  
28031 Madrid (España)

#### DATOS DE LA SOLICITUD

Solicitud de autorización del Ensayo clínico N° EudraCT 2021-001028-16 y título **Administración precoz de dexametasona en pacientes hospitalizados por neumonía Covid-19 y alto riesgo de evolución a síndrome de distrés respiratorio agudo.**

**Promotor:** Fundación para la Investigación e Innovación Biomédica (FIIB) del Hospital Universitario Infanta Leonor y Hospital Unive  
Calle Puerto de Lumbreras, 5  
28031 Madrid (España)

**Fecha de solicitud válida:** 13/03/2021

Una vez evaluada la solicitud de autorización de ensayo clínico previamente indicada, se considera que cumple con los requisitos indicados en el Real Decreto 1090/2015, de 4 de diciembre, por el que se regulan los ensayos clínicos con medicamentos, los Comités de Ética de la Investigación con medicamentos y el Registro Español de Estudios Clínicos y demás legislación aplicable\*.

Por todo lo anteriormente expuesto la Directora de la Agencia de Medicamentos y Productos Sanitarios en el ejercicio de sus competencias **RESUELVE:**

**AUTORIZAR** el ensayo clínico solicitado.

Contra esta Resolución, que pone fin a la vía administrativa, puede interponerse potestativamente Recurso de Reposición ante el/la Director/a de la Agencia Española de Medicamentos y Productos Sanitarios en el plazo de un mes, conforme a lo dispuesto en los artículos 123 y 124 de la Ley 39/2015, de 1 de octubre, del Procedimiento Administrativo Común de las Administraciones Públicas,

\* Texto refundido de la Ley de Garantías y Uso Racional de los medicamentos y productos sanitarios, aprobado por Real Decreto Legislativo 1/2015, de 24 de julio. Real Decreto 1275/2011, de 16 de septiembre, por el que se crea la Agencia estatal "Agencia Española de Medicamentos y Productos Sanitarios y se aprueba su Estatuto".

Agencia Española de Medicamentos y Productos Sanitarios (AEMPS)

Fecha de la firma: 25/05/2021

Puede comprobar la autenticidad del documento en la sede de la AEMPS: <https://localizador.aemps.es>

CSV: 94PRY9G1BC

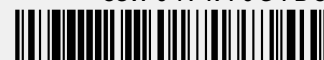

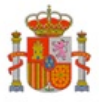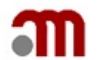

o interponerse Recurso Contencioso-Administrativo ante el Juzgado Central de lo Contencioso-Administrativo de Madrid, en el plazo de dos meses a contar desde el día siguiente a la recepción de la presente notificación, conforme a lo dispuesto en la Ley Reguladora de la Jurisdicción Contencioso-Administrativa de 13 de julio de 1998, y sin perjuicio de cualquier otro recurso que pudiera interponerse.

DIRECTORA DE LA AGENCIA ESPAÑOLA DE MEDICAMENTOS Y PRODUCTOS SANITARIOS

  **agencia española de  
medicamentos y  
productos sanitarios**

Fdo. M<sup>a</sup> Jesús Lamas Díaz

Agencia Española de Medicamentos y Productos Sanitarios (AEMPS)

Fecha de la firma: 25/05/2021

Puede comprobar la autenticidad del documento en la sede de la AEMPS: <https://localizador.aemps.es>

CSV: 9 4 P R Y 9 G 1 B C

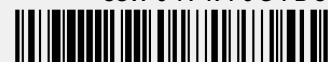

CORREO ELECTRÓNICO  
smhaem@aemps.es

Página 2 de 2

C/ CAMPEZO, 1 - EDIFICIO 8  
28022 MADRID  
Tel.: 918225073  
Fax: 918225043
